# Supplementary material for: On the effect of metal loading on the performance of Co catalysts supported on mixed MgO–La2O3 oxides for ammonia synthesis
Source: Royal Society of Chemistry journal article supplement (doi:10.1039/d2ra06053a), 2022-01-01
Supplement: d2ra06053a1.pdf [file d2ra06053a1.pdf]

## **Supplementary material**

### **On the effect of metal loading on the performance of Co catalysts supported on mixed MgO–La<sub>2</sub>O<sub>3</sub> oxides for ammonia synthesis**

Hubert Ronduda <sup>a</sup>, Magdalena Zybert <sup>a</sup>, Wojciech Patkowski <sup>a</sup>, Kamil Sobczak <sup>b</sup>, Dariusz Moszyński <sup>c</sup>, Aleksander Albrecht <sup>c</sup>, Adam Sarnecki <sup>c</sup>, and Wioletta Raróg-Pilecka <sup>a\*</sup>

<sup>a</sup> Warsaw University of Technology, Faculty of Chemistry, Noakowskiego 3, 00-664 Warsaw, Poland

<sup>b</sup> University of Warsaw Biological and Chemical Research Centre, Żwirki i Wigury 101, 02-089 Warsaw, Poland

<sup>c</sup> West Pomeranian University of Technology in Szczecin, Faculty of Chemical Technology and Engineering, 42 Piastów Ave, 71-065 Szczecin, Poland

\*Corresponding author

e-mail: [wiola@ch.pw.edu.pl](mailto:wiola@ch.pw.edu.pl)

tel. +48 22 234 57 66

Number of pages: 9

Number of figures: 12

Number of tables: 2

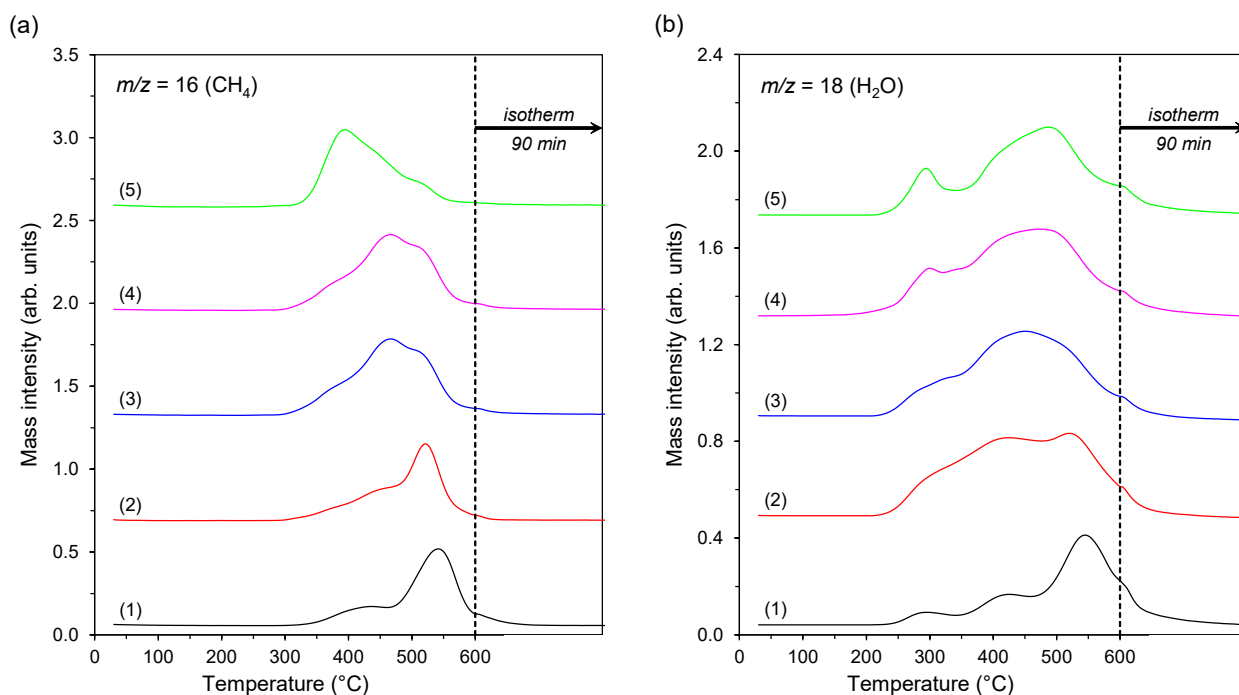

**Figure S1.** Evolution profiles of (a) CH<sub>4</sub> and (b) H<sub>2</sub>O during hydrogen temperature-programmed reduction (H<sub>2</sub>-TPR) of the Co catalyst precursors with different Co loadings: (1) Co(10)/Mg–La, (2) Co(20)/Mg–La, (3) Co(30)/Mg–La, (4) Co(40)/Mg–La, and (5) Co(50)/Mg–La.

The H<sub>2</sub>-TPR profiles of the Co catalyst precursors indicated that the formation of CH<sub>4</sub> and H<sub>2</sub>O was completed at a temperature of about 600 °C. The mass signal of  $m/z = 16$  indicated the presence of methane, which was due to the decomposition of lanthanum dioxide carbonate, accompanied by the formation of methane [1]. The mass signal of  $m/z = 18$  indicated the presence of water, which was due to the reduction of Co oxide species to metallic Co and the methanation of CO<sub>2</sub> [1].

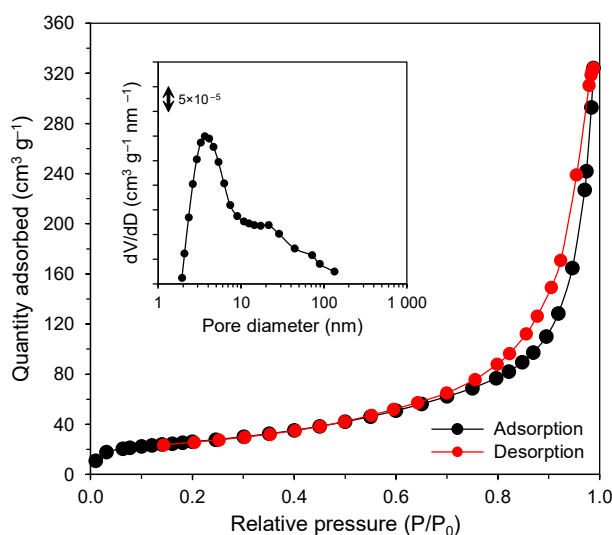

**Figure S2.** Nitrogen adsorption-desorption isotherm of the Mg–La support. The inset shows the corresponding BJH pore size distribution curve. The nitrogen adsorption-desorption isotherm was obtained from the ASAP 2020 analyser, and the surface area was calculated by Brunauer–Emmett–Teller (BET) method, pore size distribution and pore volume were estimated by Barrett–Joyner–Halenda (BJH) method.

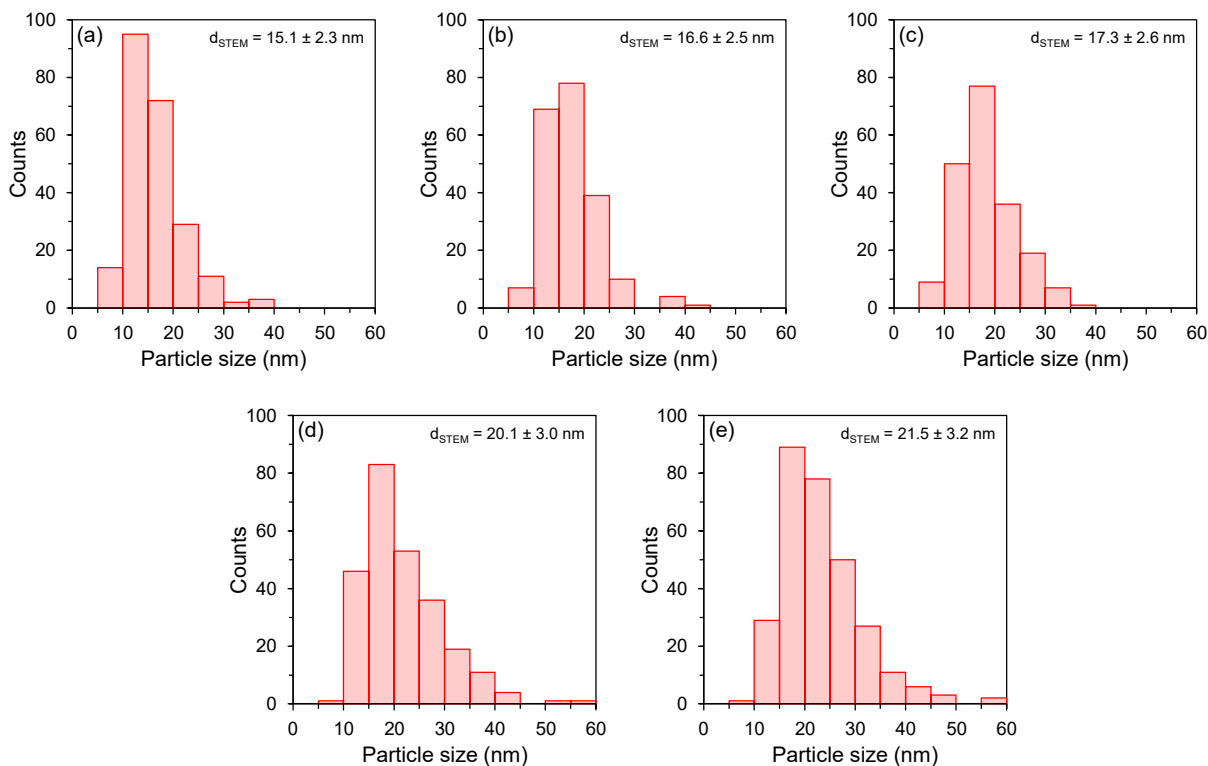

**Figure S3.** Co particle size distributions obtained from STEM-EDX images of the Co catalysts with different Co loadings: (a) Co(10)/Mg-La, (b) Co(20)/Mg-La, (c) Co(30)/Mg-La, (d) Co(40)/Mg-La, and (e) Co(50)/Mg-La.

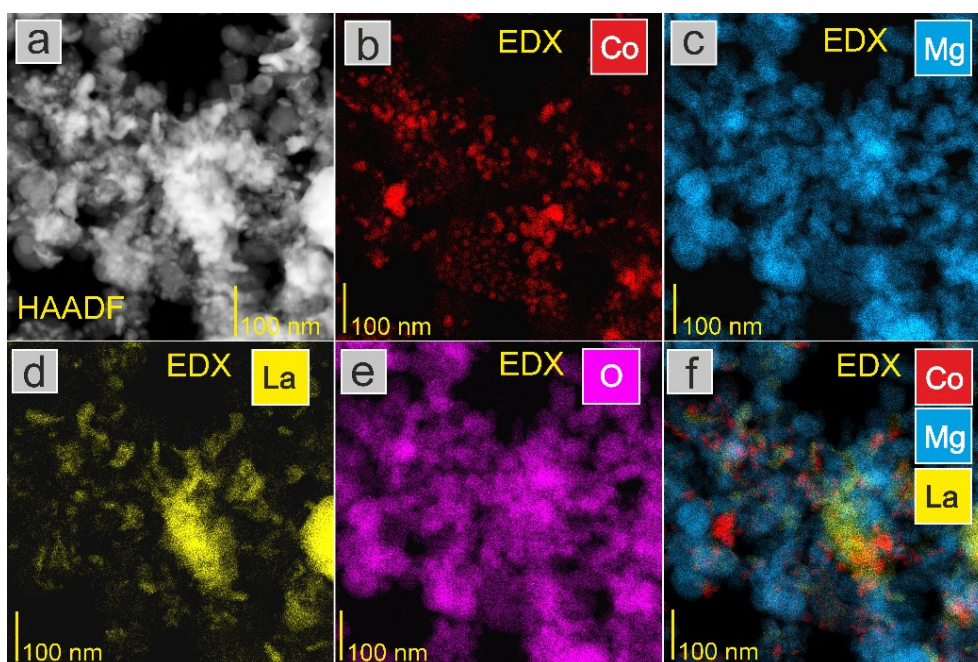

**Figure S4.** (a) HAADF-STEM image of Co(10)/Mg-La catalyst and corresponding EDX distribution maps of (b) Co-K, (c) Mg-K, (d) La-L, (e) O-K, and (f) reconstructed overlay image of Co, Mg, and La.

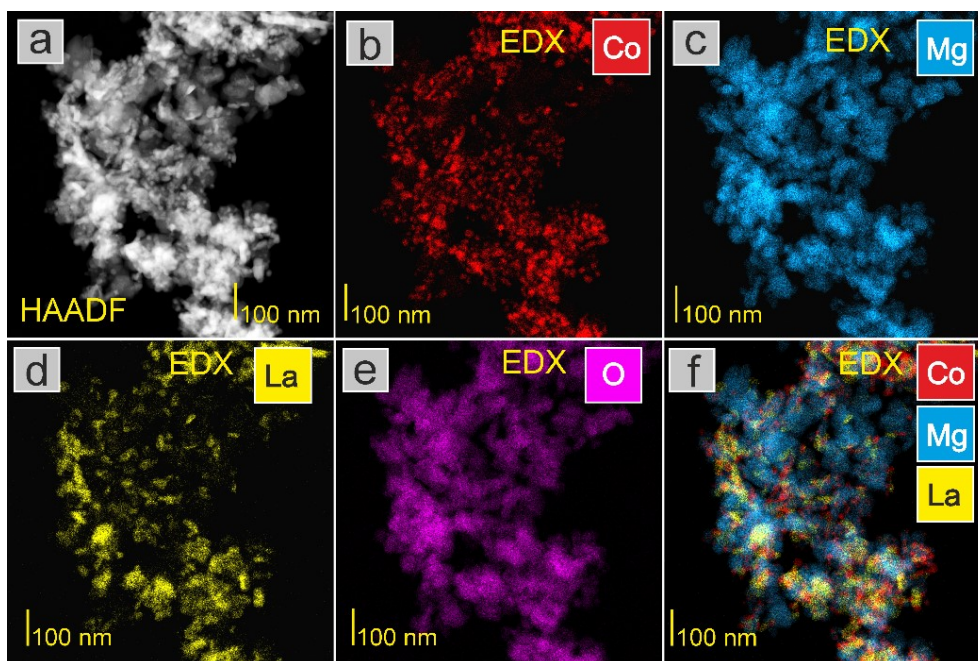

**Figure S5.** (a) HAADF-STEM image of Co(20)/Mg–La catalyst and corresponding EDX distribution maps of (b) Co-K, (c) Mg-K, (d) La-L, (e) O-K, and (f) reconstructed overlay image of Co, Mg, and La.

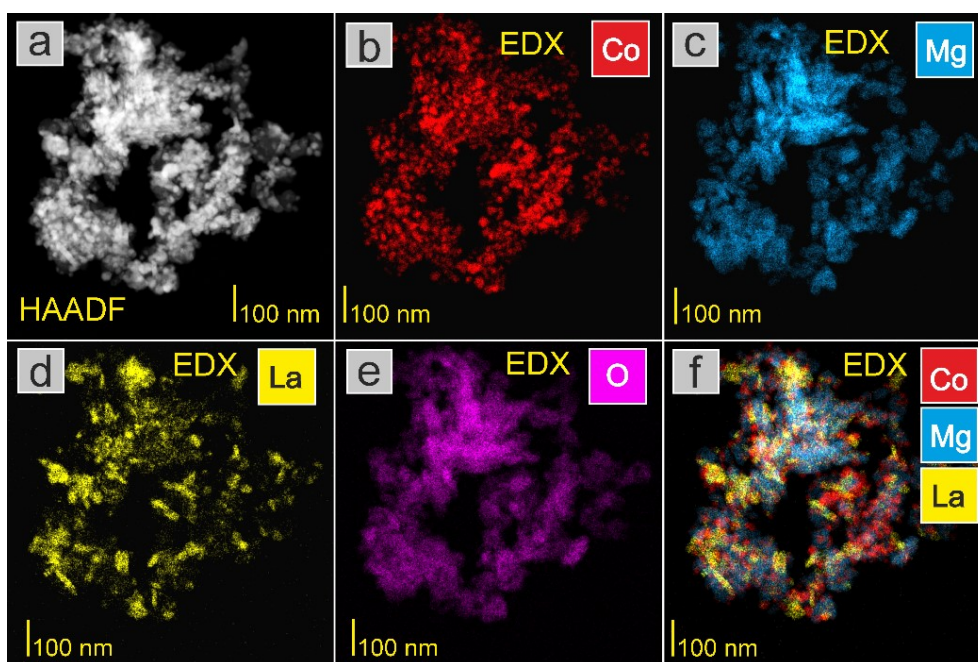

**Figure S6.** (a) HAADF-STEM image Co(30)/Mg–La catalyst and corresponding EDX distribution maps of (b) Co-K, (c) Mg-K, (d) La-L, (e) O-K, and (f) reconstructed overlay image of Co, Mg, and La.

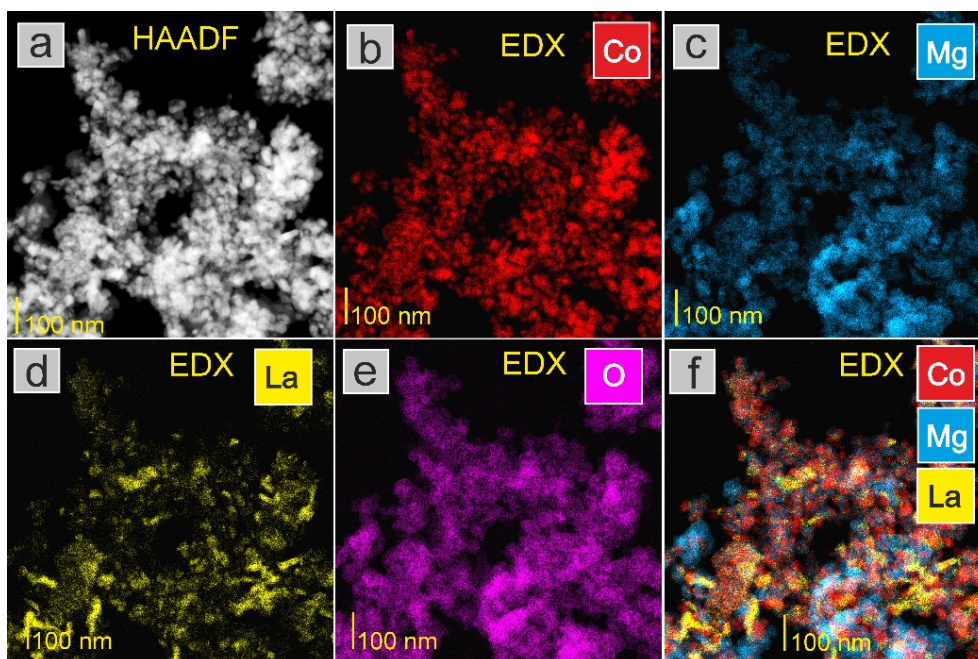

**Figure S7.** (a) HAADF-STEM image of Co(40)/Mg-La catalyst and corresponding EDX distribution maps of (b) Co-K, (c) Mg-K, (d) La-L, (e) O-K, and (f) reconstructed overlay image of Co, Mg, and La.

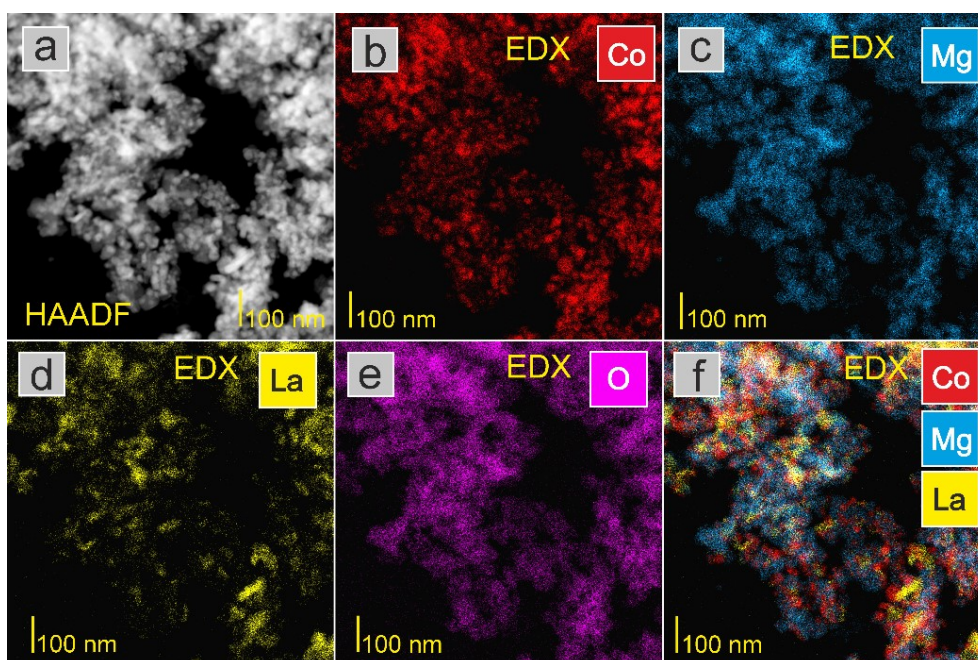

**Figure S8.** (a) HAADF-STEM image of Co(50)/Mg-La catalyst and corresponding EDX distribution maps of (b) Co-K, (c) Mg-K, (d) La-L, (e) O-K, and (f) reconstructed overlay image of Co, Mg, and La.

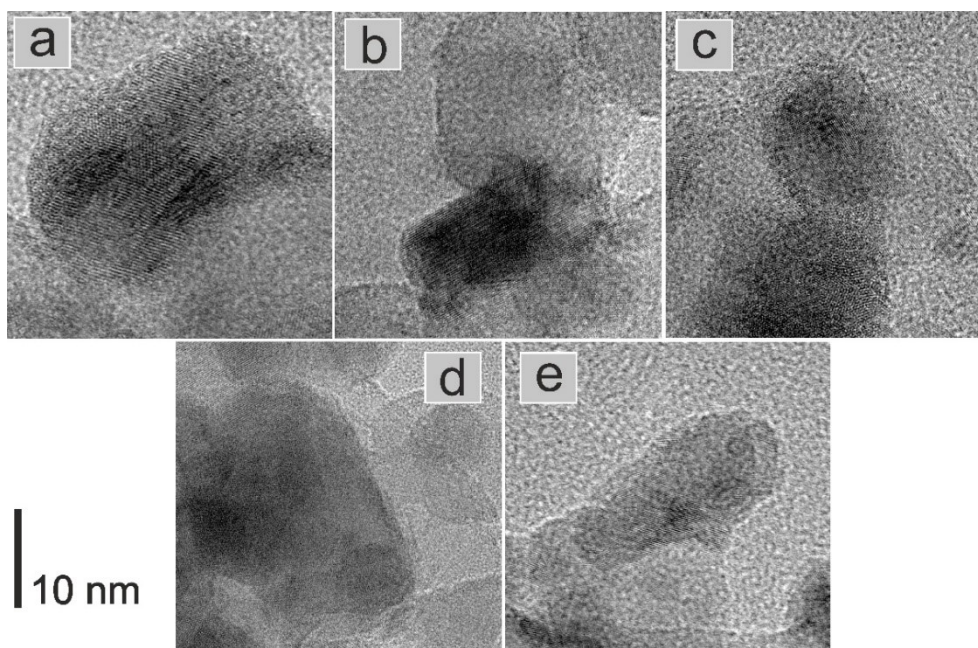

**Figure S9.** TEM images of the Co catalysts with different Co loadings: (a) Co(10)/Mg-La, (b) Co(20)/Mg-La, (c) Co(30)/Mg-La, (d) Co(40)/Mg-La, and (e) Co(50)/Mg-La.

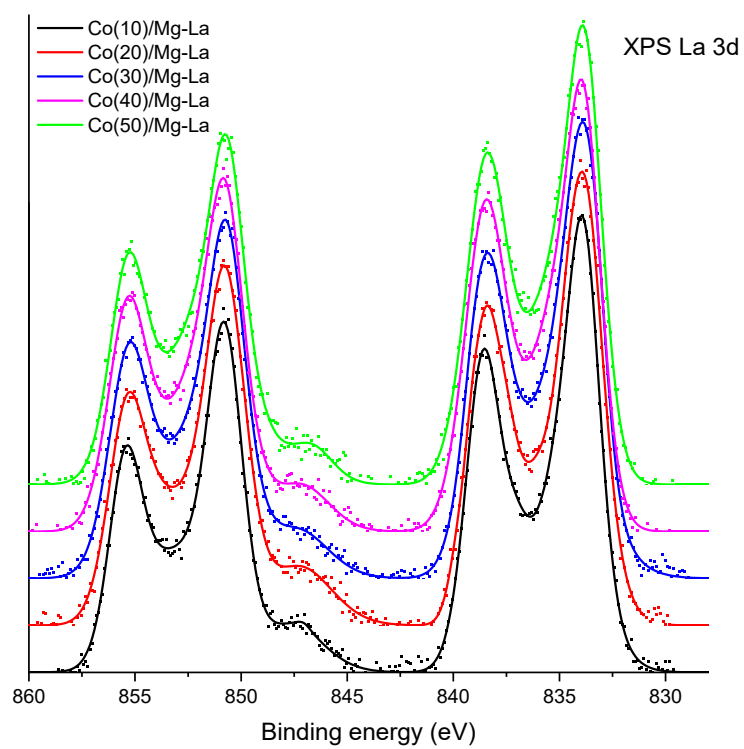

**Figure S10.** XPS La 3d spectra of the Co catalysts with different Co loadings.

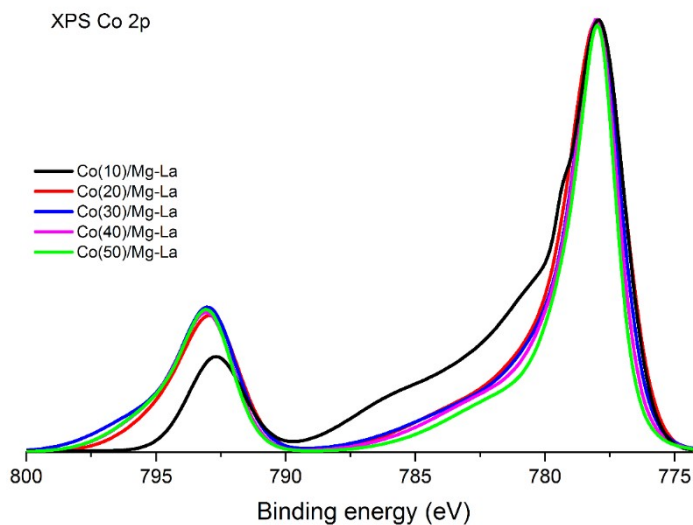

**Figure S11.** XPS Co 2p spectra of the Co catalysts with different Co loadings.

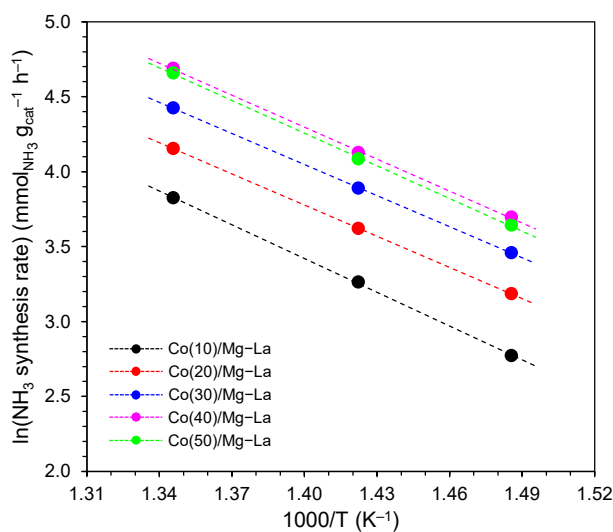

**Figure S12.** Arrhenius plots for the rate of ammonia synthesis at 6.3 MPa over the Co catalysts with different Co loadings.

**Table S1.** Composition of the Co catalysts obtained by ICP-AES.

| Entry | Catalyst     | Chemical composition (wt%) |      |      |
|-------|--------------|----------------------------|------|------|
|       |              | Co                         | Mg   | La   |
| 1     | Co(10)/Mg-La | 10.6                       | 38.1 | 28.1 |
| 2     | Co(20)/Mg-La | 21.2                       | 34.1 | 24.9 |
| 3     | Co(30)/Mg-La | 30.7                       | 28.9 | 19.9 |
| 4     | Co(40)/Mg-La | 41.1                       | 24.4 | 16.6 |
| 5     | Co(50)/Mg-La | 50.4                       | 20.7 | 15.1 |

**Table S2.** Comparison of the catalytic performance for NH<sub>3</sub> synthesis of different catalysts.

| Entry | Catalyst                                          | Metal <sup>a</sup> | Promoter <sup>a</sup>    | Reaction temperature (°C) | Reaction pressure (MPa) | Gas hourly space velocity <sup>b</sup> (mL g <sub>cat</sub> <sup>-1</sup> h <sup>-1</sup> ) | NH <sub>3</sub> synthesis rate <sup>c</sup> (mmol <sub>NH<sub>3</sub></sub> g <sub>cat</sub> <sup>-1</sup> h <sup>-1</sup> ) | Reference |
|-------|---------------------------------------------------|--------------------|--------------------------|---------------------------|-------------------------|---------------------------------------------------------------------------------------------|------------------------------------------------------------------------------------------------------------------------------|-----------|
| 1     | Ba-Ru-Li/AC                                       | Ru (5 wt%)         | Li (8 wt%) + Ba (5 wt%)  | 459                       | 3                       | 62400                                                                                       | 106                                                                                                                          | [2]       |
| 2     | Ru/MgO                                            | Ru (4 wt%)         | —                        | 400                       | 5                       | —                                                                                           | 7                                                                                                                            | [3]       |
| 3     | Ru/BaTiO <sub>3</sub>                             | Ru (4 wt%)         | —                        | 400                       | 5                       | —                                                                                           | 16                                                                                                                           | [3]       |
| 4     | Ru/CeO <sub>2</sub>                               | Ru (4 wt%)         | —                        | 400                       | 5                       | —                                                                                           | 9                                                                                                                            | [3]       |
| 5     | Ru/CeO <sub>2</sub> -r                            | Ru (10 wt%)        | —                        | 400                       | 10                      | 233300                                                                                      | 115                                                                                                                          | [4]       |
| 6     | Ru/La <sub>2</sub> Ce <sub>2</sub> O <sub>7</sub> | Ru (4 wt%)         | —                        | 425                       | 10                      | —                                                                                           | 53                                                                                                                           | [5]       |
| 7     | Fe <sub>1-x</sub> O                               | Fe (70 wt%)        | Al + Ca + K (<10 wt%)    | 430                       | 3                       | 7200                                                                                        | 12                                                                                                                           | [6]       |
| 8     | Fe <sub>3</sub> O <sub>4</sub>                    | Fe (70 wt%)        | Al + Ca + K (<10 wt%)    | 430                       | 3                       | 7200                                                                                        | 9                                                                                                                            | [6]       |
| 9     | FeOOH-K/Al <sub>2</sub> O <sub>3</sub>            | Fe (22 wt%)        | K (5 wt%)                | 500                       | 9                       | 12000                                                                                       | 29                                                                                                                           | [7]       |
| 10    | 2%Cs-FePc                                         | Fe (19 wt%)        | Cs (2 wt%)               | 400                       | 7                       | 12000                                                                                       | 20                                                                                                                           | [8]       |
| 11    | 10%Cs-FePc                                        | Fe (19 wt%)        | Cs (10 wt%)              | 400                       | 7                       | 12000                                                                                       | 26                                                                                                                           | [8]       |
| 12    | Fe <sub>1-x</sub> O (ZA-5)                        | Fe                 | Al + Ca + K + ...        | 400                       | 10                      | 10000                                                                                       | 19                                                                                                                           | [9,10]    |
| 13    | Co/Ba                                             | Co (73 wt%)        | Ba (12 wt%)              | 400                       | 6.3                     | 170300                                                                                      | 51                                                                                                                           | [11]      |
| 14    | Co/La/Ba                                          | Co (59 wt%)        | Ba (11 wt%) + La (7 wt%) | 400                       | 6.3                     | 137700                                                                                      | 76                                                                                                                           | [11]      |
| 15    | Co/CeO <sub>2</sub> -H                            | Co (7 wt%)         | —                        | 400                       | 10                      | 240000                                                                                      | 35                                                                                                                           | [12]      |
| 16    | Co/CeO <sub>2</sub>                               | Co (6 wt%)         | —                        | 400                       | 10                      | —                                                                                           | 12                                                                                                                           | [13]      |
| 17    | Ba-Co/CeO <sub>2</sub>                            | Co (6 wt%)         | Ba (3 wt%)               | 400                       | 10                      | —                                                                                           | 15                                                                                                                           | [13]      |
| 18    | K-Co/CeO <sub>2</sub>                             | Co (6 wt%)         | K (9 wt%)                | 400                       | 10                      | —                                                                                           | 3                                                                                                                            | [13]      |
| 19    | Co(10)/Mg-La                                      | Co (10 wt%)        | —                        | 400                       | 6.3                     | 140000                                                                                      | 16                                                                                                                           | This work |
| 20    | Co(20)/Mg-La                                      | Co (20 wt%)        | —                        | 400                       | 6.3                     | 140000                                                                                      | 24                                                                                                                           | This work |
| 21    | Co(30)/Mg-La                                      | Co (30 wt%)        | —                        | 400                       | 6.3                     | 140000                                                                                      | 32                                                                                                                           | This work |
| 22    | Co(40)/Mg-La                                      | Co (40 wt%)        | —                        | 400                       | 6.3                     | 140000                                                                                      | 40                                                                                                                           | This work |
| 23    | Co(50)/Mg-La                                      | Co (50 wt%)        | —                        | 400                       | 6.3                     | 140000                                                                                      | 38                                                                                                                           | This work |

<sup>a</sup> Rounded to the nearest 1 wt%. <sup>b</sup> Rounded to the nearest 100 mL g<sub>cat</sub><sup>-1</sup> h<sup>-1</sup>. <sup>c</sup> Rounded to the nearest 1 mmol<sub>NH<sub>3</sub></sub> g<sub>cat</sub><sup>-1</sup> h<sup>-1</sup>



## References

- [1] H. Ronduda, M. Zybert, W. Patkowski, A. Ostrowski, P. Jodłowski, D. Szymański, W. Raróg-Pilecka, Co supported on Mg–La mixed oxides as an efficient catalyst for ammonia synthesis, *Int. J. Hydrogen Energy*, 2022, **47**, 35689–35700. <https://doi.org/10.1016/j.ijhydene.2022.08.144>
- [2] J. Zheng, F. Liao, S. Wu, G. Jones, T.-Y. Chen, J. Fellowes, T. Sudmeier, I.J. McPherson, I. Wilkinson, S.C.E. Tsang, Efficient Non-dissociative Activation of Dinitrogen to Ammonia over Lithium-Promoted Ruthenium Nanoparticles at Low Pressure, *Angew. Chem. Int. Ed.*, 2019, **58**, 17335–17341. <https://doi.org/10.1002/anie.201907171>
- [3] Z. Wang, J. Lin, R. Wang, K. Wei, Ammonia synthesis over ruthenium catalyst supported on perovskite type BaTiO<sub>3</sub>, *Catal. Commun.*, 2013, **32**, 11–14. <https://doi.org/10.1016/j.catcom.2012.11.024>
- [4] B. Lin, Y. Liu, L. Heng, X. Wang, J. Ni, J. Lin, L. Jiang, Morphology Effect of Ceria on the Catalytic Performances of Ru/CeO<sub>2</sub> Catalysts for Ammonia Synthesis, *Ind. Eng. Chem. Res.*, 2018, **57**, 9127–9135. <https://doi.org/10.1021/acs.iecr.8b02126>
- [5] W. Han, Z. Li, H. Liu, La<sub>2</sub>Ce<sub>2</sub>O<sub>7</sub> supported ruthenium as a robust catalyst for ammonia synthesis, *J. Rare Earths*, 2019, **37**, 492–499. <https://doi.org/10.1016/j.jre.2018.09.010>
- [6] A. Jafari, A. Ebadi, S. Sahebdehfar, Effect of iron oxide precursor on the properties and ammonia synthesis activity of fused iron catalysts, *Reac. Kinet. Mech. Cat.*, 2019, **126**, 307–325. <https://doi.org/10.1007/s11144-018-1498-6>
- [7] H. Fan, X. Huang, K. Kähler, J. Folke, F. Girgsdies, D. Teschner, Y. Ding, K. Hermann, R. Schlögl, E. Frei, In-Situ Formation of Fe Nanoparticles from FeOOH Nanosheets on  $\gamma$ -Al<sub>2</sub>O<sub>3</sub> as Efficient Catalysts for Ammonia Synthesis, *ACS Sustainable Chem Eng.*, 2017, **5**, 10900–10909. <https://doi.org/10.1021/acssuschemeng.7b02812>
- [8] N. Morlanés, W. Almaksoud, R.K. Rai, S. Ould-Chikh, M.M. Ali, B. Vidjayacoumar, B.E. Al-Sabban, K. Albahily, J.-M. Basset, Development of catalysts for ammonia synthesis based on metal phthalocyanine materials, *Catal. Sci. Technol.*, 2020, **10**, 844–852. <https://doi.org/10.1039/C9CY02326G>
- [9] M. Zybert, M. Karasińska, E. Truszkiewicz, B. Mierzwa, W. Raróg-Pilecka, Properties and activity of the cobalt catalysts for NH<sub>3</sub> synthesis obtained by co-precipitation – the effect of lanthanum addition, *Pol. J. Chem. Technol.*, 2015, **17**, 138–143. <https://doi.org/10.1515/pjct-2015-0020>
- [10] Y. Zhou, Y. Ma, G. Lan, H. Tang, W. Han, H. Liu, Y. Li, A highly stable and active mesoporous ruthenium catalyst for ammonia synthesis prepared by a RuCl<sub>3</sub>/SiO<sub>2</sub>-templated approach, *Chin. J. Catal.*, 2019, **40**, 114–123. [https://doi.org/10.1016/S1872-2067\(18\)63192-4](https://doi.org/10.1016/S1872-2067(18)63192-4)
- [11] H. Liu, *Ammonia Synthesis Catalysts: Innovation and Practice*, World Scientific, 2013.
- [12] B. Lin, Y. Qi, K. Wei, J. Lin, Effect of pretreatment on ceria-supported cobalt catalyst for ammonia synthesis, *RSC Adv.*, 2014, **4**, 38093–38102. <https://doi.org/10.1039/C4RA06175F>
- [13] B. Lin, Y. Liu, L. Heng, J. Ni, J. Lin, L. Jiang, Effect of barium and potassium promoter on Co/CeO<sub>2</sub> catalysts in ammonia synthesis, *J. Rare Earths*, 2018, **36**, 703–707. <https://doi.org/10.1016/j.jre.2018.01.017>
